# Supplementary material
Source: Springer Nature journal article supplement (https://www.springermedizin.de/resource/supplementary/12916_2012_711_MOESM4_ESM.pdf/9598732)

# FVL-CONTROL

# FVL Q/+ -APS

# FVL Q/Q -APS

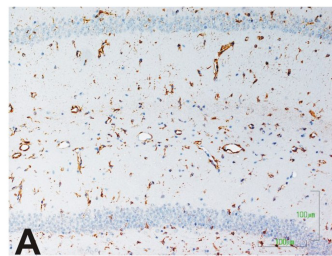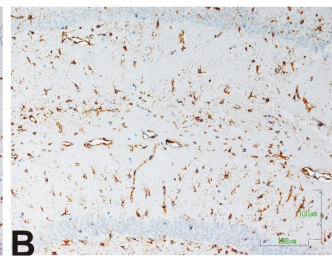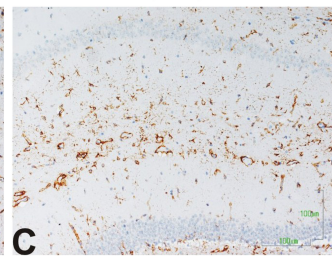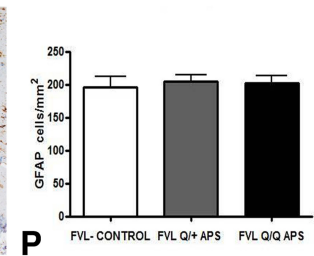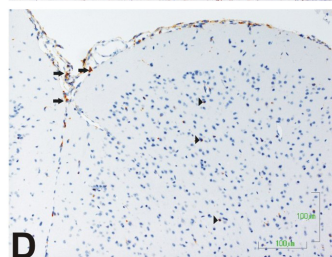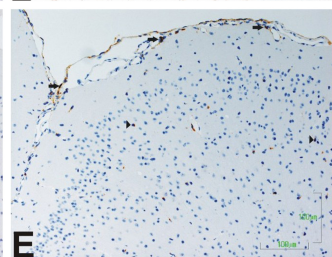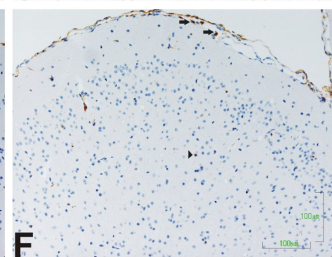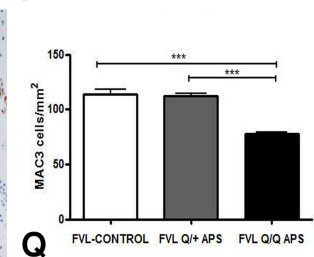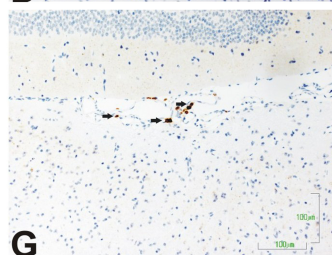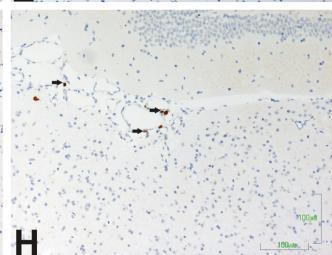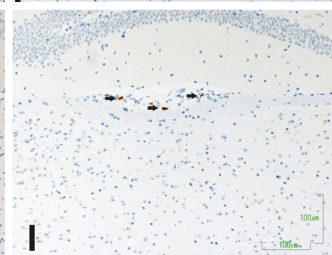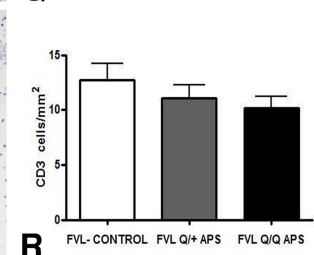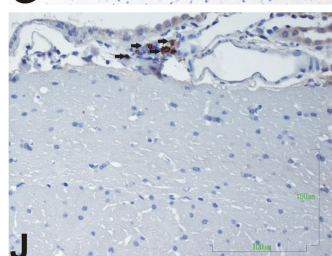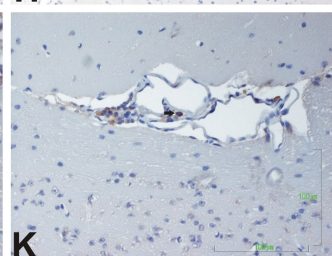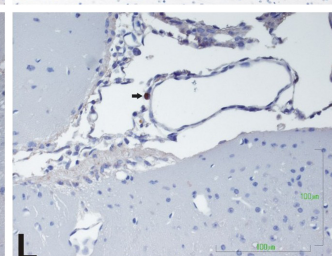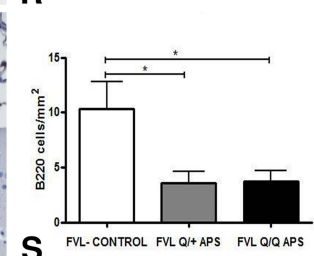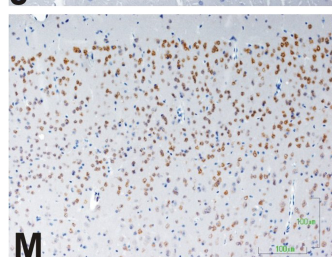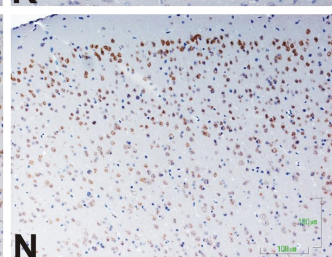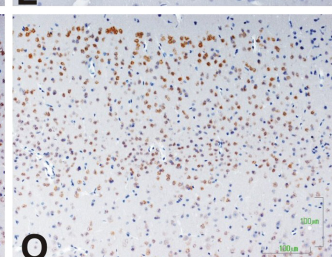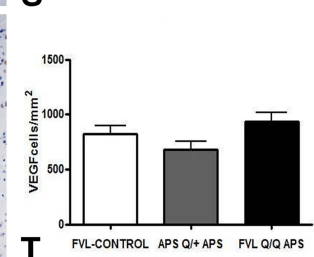

Supplement: MOESM4 [file 9598732]
